# Supplementary material
Source: PubMed Central journal article supplement (PMC11653296)
Supplement: NIHMS2041396-supplement-Supplementary_Material.pdf [file NIHMS2041396-supplement-Supplementary_Material.pdf]

---

**Supplementary information**

---

**The trials and tribulations of determining  
HbA<sub>1c</sub> targets for diabetes mellitus**

---

In the format provided by the  
authors and unedited

| Study (year)                                     | Diabetes type | Length of follow-up (years) | Intensive glycemic control target |                                                      | Mean age at baseline (years)     | Mean diabetes duration (years) | Baseline HbA1c (%) | Achieved HbA1c (%)  | Microvascular outcomes                                                                                                                                                                    | Macrovascular events                                                                                                            | Mortality                                                                                         | Adverse events                                                                                                                                                  |
|--------------------------------------------------|---------------|-----------------------------|-----------------------------------|------------------------------------------------------|----------------------------------|--------------------------------|--------------------|---------------------|-------------------------------------------------------------------------------------------------------------------------------------------------------------------------------------------|---------------------------------------------------------------------------------------------------------------------------------|---------------------------------------------------------------------------------------------------|-----------------------------------------------------------------------------------------------------------------------------------------------------------------|
| DCCT (1993) <sup>1</sup>                         | T1D           | median: 6.5                 | HbA1c <6.05%                      | primary intervention cohort (no retinopathy)         | 26 (standard) vs. 27 (intensive) | 2.6                            | mean: 8.8          | mean: 7.4 vs 9.1    | Sustained retinopathy: RRR 76% (95% CI, 62-85)<br>Microalbuminuria >40mg/24hr: RRR 34% (95% CI, 2-56)<br>Neuropathy: RRR 69% (95% CI, 24-87)                                              | No significant difference                                                                                                       | No significant difference                                                                         | Hypoglycemia: 62 per 100 patient-years (intensive) vs 19 per 100 patient-years (conventional)<br>Weight gain: 33% (intensive) vs 9.3% (conventional)            |
|                                                  |               |                             |                                   | secondary intervention cohort (baseline retinopathy) | 27                               | 8.6                            | Mean: 9            | mean: 7.2 vs 9.1    | Severe retinopathy: RRR 47% (95% CI, 15-67)<br>Albuminuria >40mg/24hr: RRR 43% (95% CI, 21-58)<br>Albuminuria >300mg/24hr: RRR 56% (95% CI, 18-76)<br>Neuropathy: RRR 57% (95% CI, 29-73) |                                                                                                                                 |                                                                                                   |                                                                                                                                                                 |
| UKPDS 33 (1998) <sup>2</sup> (SU, basal insulin) | T2D           | median: 11.1                | FPG <110 mg/dL vs FPG <270 mg/dL  |                                                      | 54                               | newly diagnosed                | mean: 7.08         | median: 7.0 vs. 7.9 | Combined microvascular: RRR 25% (95% CI, 7-40)                                                                                                                                            | No significant difference                                                                                                       | No significant difference                                                                         | Weight gain: 3.1kg (95% CI, -0.9 to 7)                                                                                                                          |
| UKPDS 34 (1998) <sup>3</sup> (metformin)         | T2D           | Median: 10.7                | FPG <110 mg/dL vs FPG <270 mg/dL  |                                                      | 53                               | newly diagnosed                | median: 7.2        | median: 7.4 vs. 8.0 | Any diabetes related endpoint: RRR 32% (95% CI, 13-47)<br>Retinopathy: Minimal slowing of progression, but not sustained                                                                  | Myocardial infarction: RRR 39% (p=0.01)<br>Composite macrovascular diseases: RRR 30% (95% CI, 5-48)                             | Any diabetes related death: RRR 42% (95% CI, 9-63)<br>All cause mortality: RRR 36% (95% CI, 9-55) | 96% increased risk for diabetes-related death, 60% increased risk of mortality with early addition of metformin to sulfonylurea therapy.                        |
| ACCORD (2008) <sup>4</sup>                       | T2D           | mean: 3.5 (stopped early)   | HbA1c <6.0%                       |                                                      | 62.2                             | 10 (high risk for CVD)         | median 8.1         | median: 6.4 vs 7.5  | No significant difference                                                                                                                                                                 | MACE: HR 0.90 (95% CI, 0.78-1.04) Nonfatal MI: HR 0.76 (95% CI, 0.62-0.92)<br>Death from CV causes: HR 1.35 (95% CI, 1.04-1.76) | All cause-mortality: HR 1.22 (95% CI, 1.01-1.46)                                                  | Increased risk of hypoglycemia requiring any assistance (16.2% vs. 51%)<br>Weight gain: 3.5kg vs 0.4kg                                                          |
| ADVANCE (2008) <sup>5</sup>                      | T2D           | median: 5                   | HbA1c <6.5%                       |                                                      | 66                               | 7.9 (high risk for CVD)        | mean: 7.5          | mean: 6.5 vs 7.3    | Major microvascular events: HR 0.86 (95% CI, 0.77-0.97)<br>Renal events: HR 0.79 (95% CI, 0.66-0.93)<br>no significant difference in neuropathy/retinopathy                               | No significant difference                                                                                                       | No significant difference                                                                         | Hypoglycemia: HR 1.86 (95% CI, 1.42-2.4), although hypoglycemia events were uncommon 2.7% (intensive) vs 1.5% (control)                                         |
| VADT (2009) <sup>6</sup>                         | T2D           | median: 5.6                 | Absolute HbA1c reduction of 1.5%  |                                                      | 60.4                             | 11.5 (high risk for CVD)       | median: 9.4        | median: 6.9 vs. 8.4 | Any increase in albuminuria: 9.1% (intensive) vs. 13.8% (control) (p = 0.01)                                                                                                              | No significant difference                                                                                                       | No significant difference                                                                         | Any serious AE: 24.1% (intensive) vs. 17.6% (control) (p = 0.05)<br>Hypoglycemia was significantly increased in the intensive group. BMI 33.8 vs. 32.3 (p=0.01) |

**Table 1. Brief summary of the major findings in the guideline defining trials**

ACCORD = Action to Control Cardiovascular Risk in Diabetes; ADVANCE = Action in Diabetes and Vascular Disease: preterax and Diamicon Modified Release Controlled Evaluation; AE = adverse event; BMI = body mass index; CV = cardiovascular; CVD = cardiovascular disease; DCCT = Diabetes Control and Complications Trial; HbA1c = glycated hemoglobin; HR = hazard ratio; MACE = major adverse cardiac event (defined as time to first major CV event: nonfatal MI, nonfatal stroke, or death from CVD); MI = myocardial infarction; RR = relative risk; RRR = relative risk reduction; T1D = type 1 diabetes; T2D = type 2 diabetes; UKPDS = United Kingdom Prospective Diabetes Study; VADT = Veterans Affairs Diabetes Trial.

## References

- 1 Nathan, D. M. *et al.* The effect of intensive treatment of diabetes on the development and progression of long-term complications in insulin-dependent diabetes mellitus. *N Engl J Med* **329**, 977-986 (1993).
- 2 UK Prospective Diabetes Study (UKPDS) Group. Intensive blood-glucose control with sulphonylureas or insulin compared with conventional treatment and risk of complications in patients with type 2 diabetes (UKPDS 33). UK Prospective Diabetes Study (UKPDS) Group. *Lancet* **352**, 837-853 (1998).
- 3 UK Prospective Diabetes Study (UKPDS) Group. Effect of intensive blood-glucose control with metformin on complications in overweight patients with type 2 diabetes (UKPDS 34). UK Prospective Diabetes Study (UKPDS) Group. *Lancet* **352**, 854-865 (1998).
- 4 Gerstein, H. C. *et al.* Effects of intensive glucose lowering in type 2 diabetes. *N Engl J Med* **358**, 2545-2559 (2008).
- 5 Patel, A. *et al.* Intensive blood glucose control and vascular outcomes in patients with type 2 diabetes. *N Engl J Med* **358**, 2560-2572 (2008).
6. Duckworth, W. *et al.* Glucose control and vascular complications in veterans with type 2 diabetes. *N Engl J Med* **360**, 129-139 (2009).
